# Supplementary material for: Evaluation of Fermented Extracts of Aloe vera Processing Byproducts as Potential Functional Ingredients
Source: MDPI journal article supplement (doi:10.3390/fermentation7040269), 2021-11-19
Supplement: s1 [file s1]

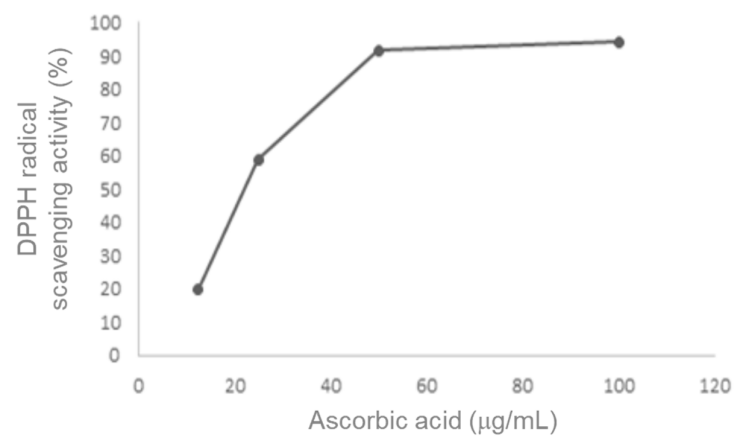

**Figure S1.** Calibration curve of ascorbic acid for DPPH radical scavenging activity,

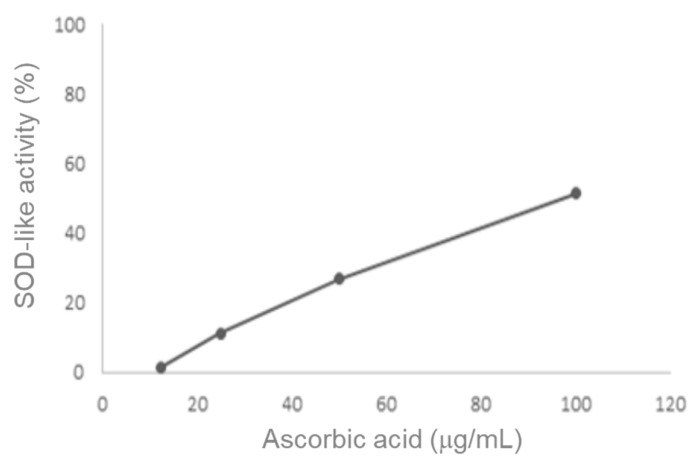

**Figure S2.** Calibration curve of ascorbic acid for SOD-like activity.
